# Supplementary material
Source: bioRxiv or medRxiv preprint supplement (https://www.biorxiv.org/highwire/filestream/4359/field_highwire_adjunct_files/5/017178-6.pdf)

log10(flows)

0.31 \*\*

0.44 \*\*\*

CC

0.24 \*

-GCD

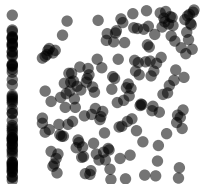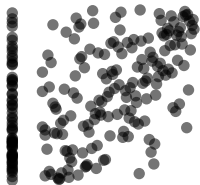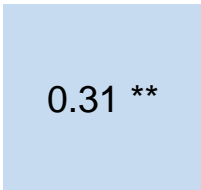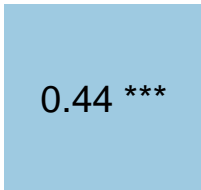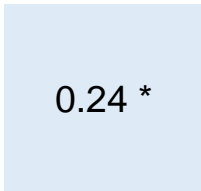

Supplement: Supplementary file [file 017178-6.pdf]
